# Supplementary material for: Self-diffusion and shear viscosity of pure 1-alkanol unary system: molecular dynamics simulation and review of experimental data
Source: Royal Society of Chemistry journal article supplement (doi:10.1039/d4ra03494e), 2024-01-01

## Supporting Information

### Self-diffusion and shear viscosity of pure 1-alkanol unary system: molecular dynamics simulation and review of experimental data

Adnan Jaradat<sup>1</sup>, Rakan Al-Salman<sup>1</sup> and Abdalla Obeidat\*<sup>1</sup>

<sup>1</sup>Department of Physics, Jordan University of Science and Technology, Irbid, Jordan

\*Corresponding author: aobeidat@just.edu.jo

#### Comparison between Linear and Non-Linear Models in Extracting Activation Energy

To extract activation energy from experimental data, both linear models (Arrhenius equation) and non-linear models (such as the Vogel-Fulcher-Tammann (VFT) equation) can be used. The choice of the appropriate model depends on the nature of the system and the behavior of the data.

The Arrhenius equation is simple, widely used, and straightforward to apply and interpret. This model has several advantages. Firstly, it is easy to apply and interpret. Secondly, when plotting  $\log_{10}(D, \eta)$  versus  $1/T$ , it produces a straight line, making it easy to extract the activation energy from the slope. Thirdly, it is well-documented and understood, facilitating comparisons with existing literature.

However, the Arrhenius equation has some disadvantages. It assumes a single activation energy over the entire temperature range, which may not be valid for all systems. Additionally, it may not accurately describe systems with complex temperature dependence.

On the other hand, the Vogel-Fulcher-Tammann (VFT) equation is an example of a non-linear model. The VFT equation is better suited for systems where diffusion or viscosity changes significantly with temperature, such as glass-forming liquids. It can capture more complex behaviors, providing a more accurate representation of the data. However, it is more complex to apply and interpret. The relationship is non-linear, making it harder to extract and interpret parameters. Additionally, it is less common, so there may be fewer studies for comparison.

When choosing the appropriate model, several practical considerations should be considered. If the data plot as a straight line on an Arrhenius plot  $\log_{10}(D, \eta)$  versus  $1/T$ , the linear model is likely sufficient and appropriate. If there are significant deviations from linearity, a non-linear model might be necessary. For narrow temperature ranges, the Arrhenius equation often works well. For broader ranges or systems approaching a glass transition or other critical points, non-linear models might be more accurate. For simple systems with well-defined activation energies, linear models are appropriate. For systems with complex interactions or multiple processes contributing to diffusion, non-linear models provide a better fit.

For our study on the self-diffusion and shear viscosity of 1-alkanols from methanol to 1-hexanol, starting with the Arrhenius equation is reasonable. The fits shown in all the plots demonstrate the linear trend within the temperature range used in this study for both experimental and simulation results (see Figure S1 for example). Any deviations from linearity are very small. Additionally, the additional parameters in non-linear equations significantly affect the extraction of activation energies

from the fitting process, especially given the use of multiple sources with noticeable differences in values. This makes non-linear fitting impractical for our study. Moreover, many studies have successfully used linear fitting for primary alcohol systems with simple structures, demonstrating the efficiency of linear fitting in extracting activation energies for self-diffusion and viscosity. In conclusion, while both linear and non-linear models have their merits, the linear model provides a practical and effective approach for our specific study on 1-alkanols, ensuring simplicity and accuracy in determining activation energy.

**Figure S1:** The dependence of each experimental reference self-diffusion on the temperature for methanol (MeOH), ethanol (EtOH), 1-propanol (PrOH), 1-butanol (BuOH), 1-pentanol (PeOH), and 1-hexanol (HxOH). Solid lines are the linear fitting using the Arrhenius equation.

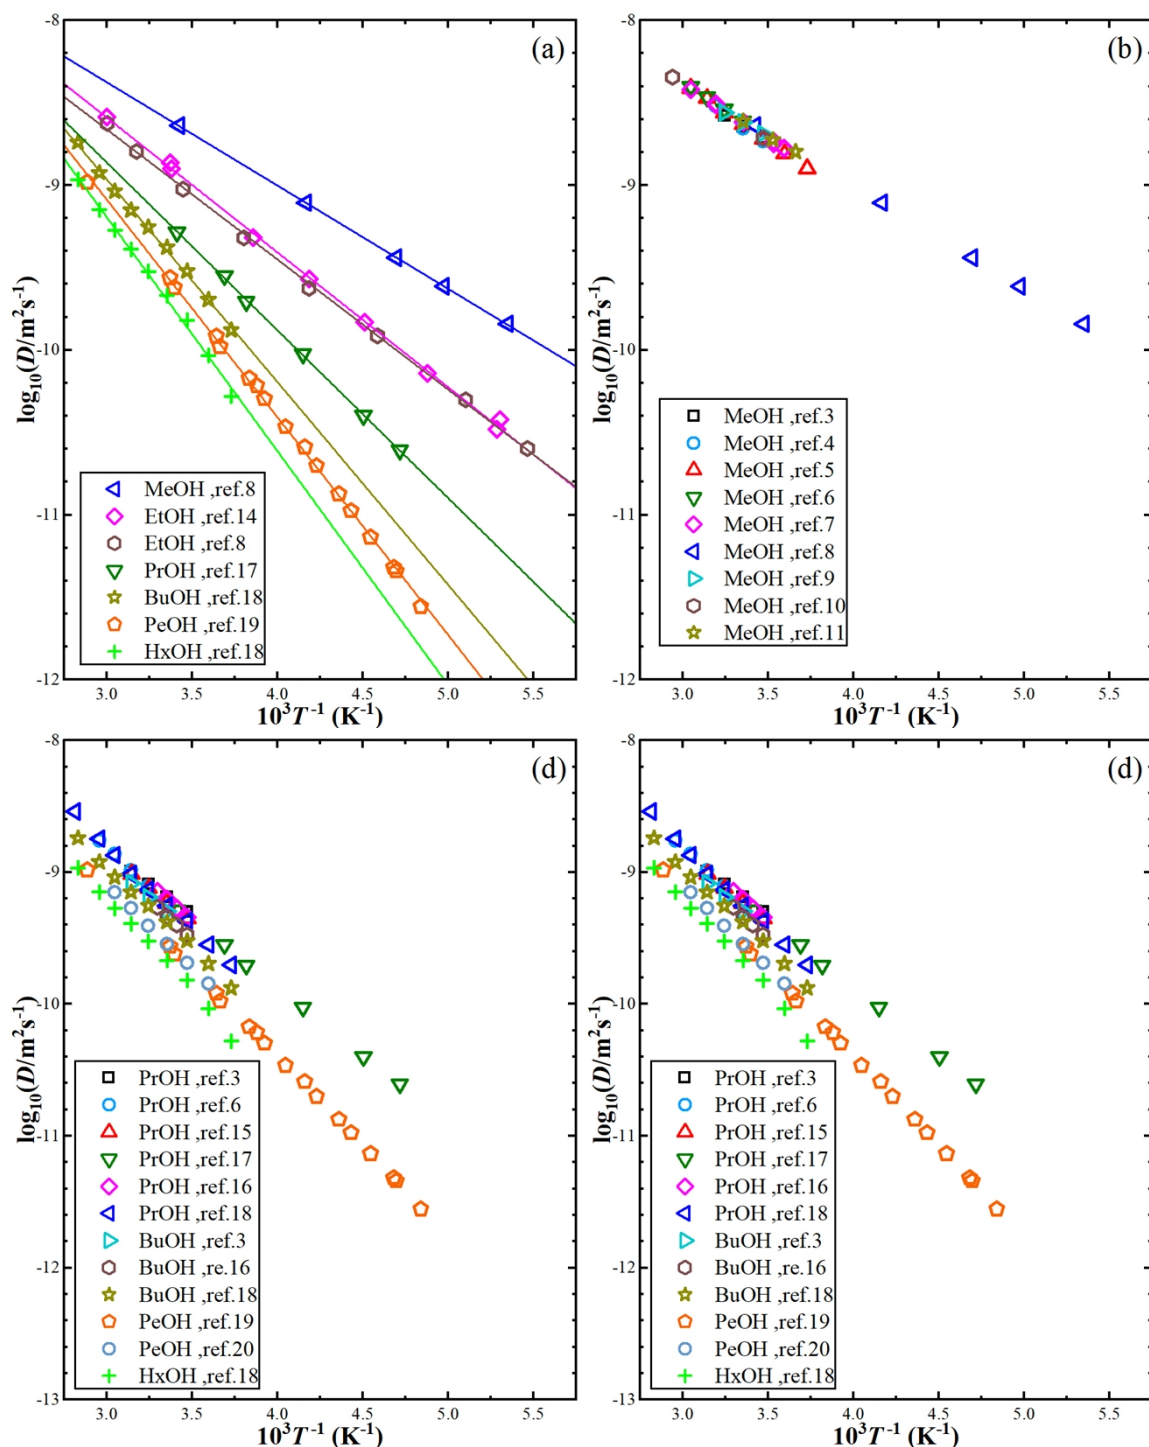

**Figure S2:** The dependence of the experimental self-diffusion (Left) and shear viscosity (Right) on the temperature. methanol (MeOH), ethanol (EtOH), 1-propanol (PrOH), 1-butanol (BuOH), 1-pentanol (PeOH), and 1-hexanol (HxOH). Solid curves represent the exponential fitting using all points, and dash line for exponential fitting using points within the temperature range of (265-330K) by using the Arrhenius equation.

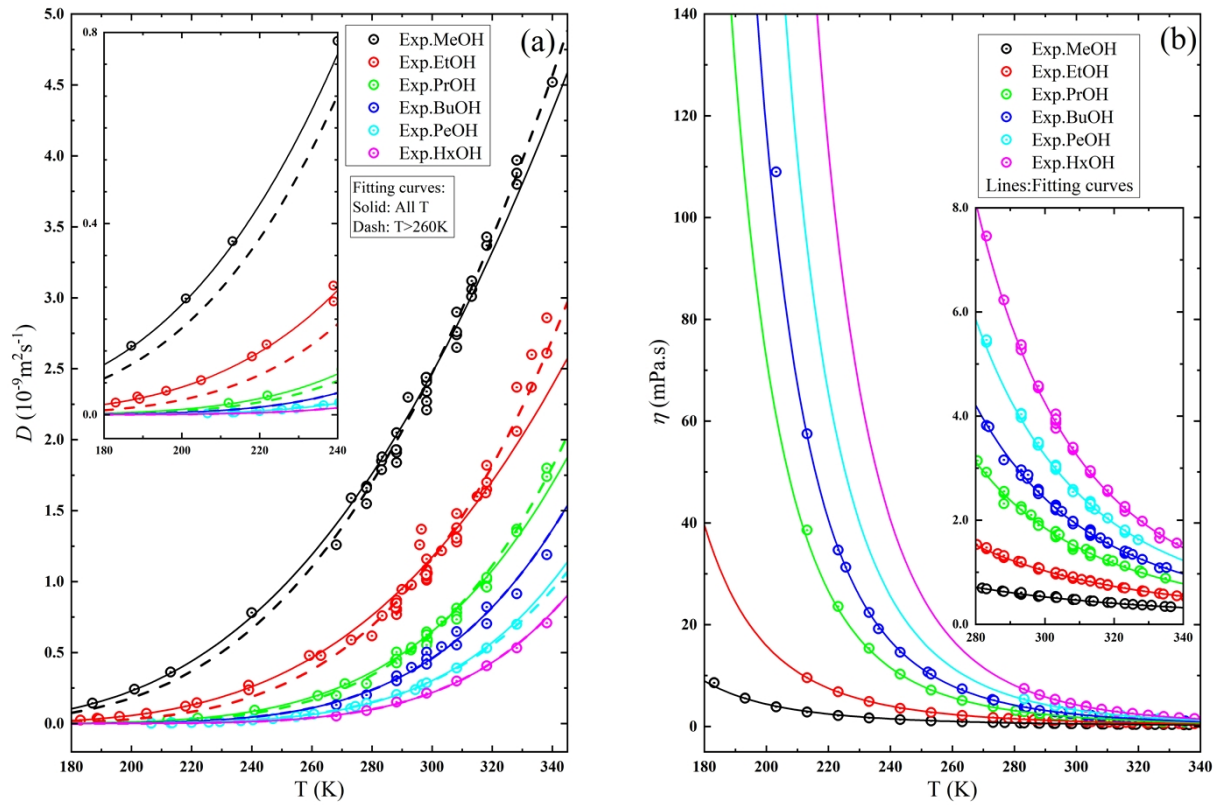

**Figure S3:** The relationship between shear viscosity and temperature divided by self-diffusion for each 1-alkanol system.

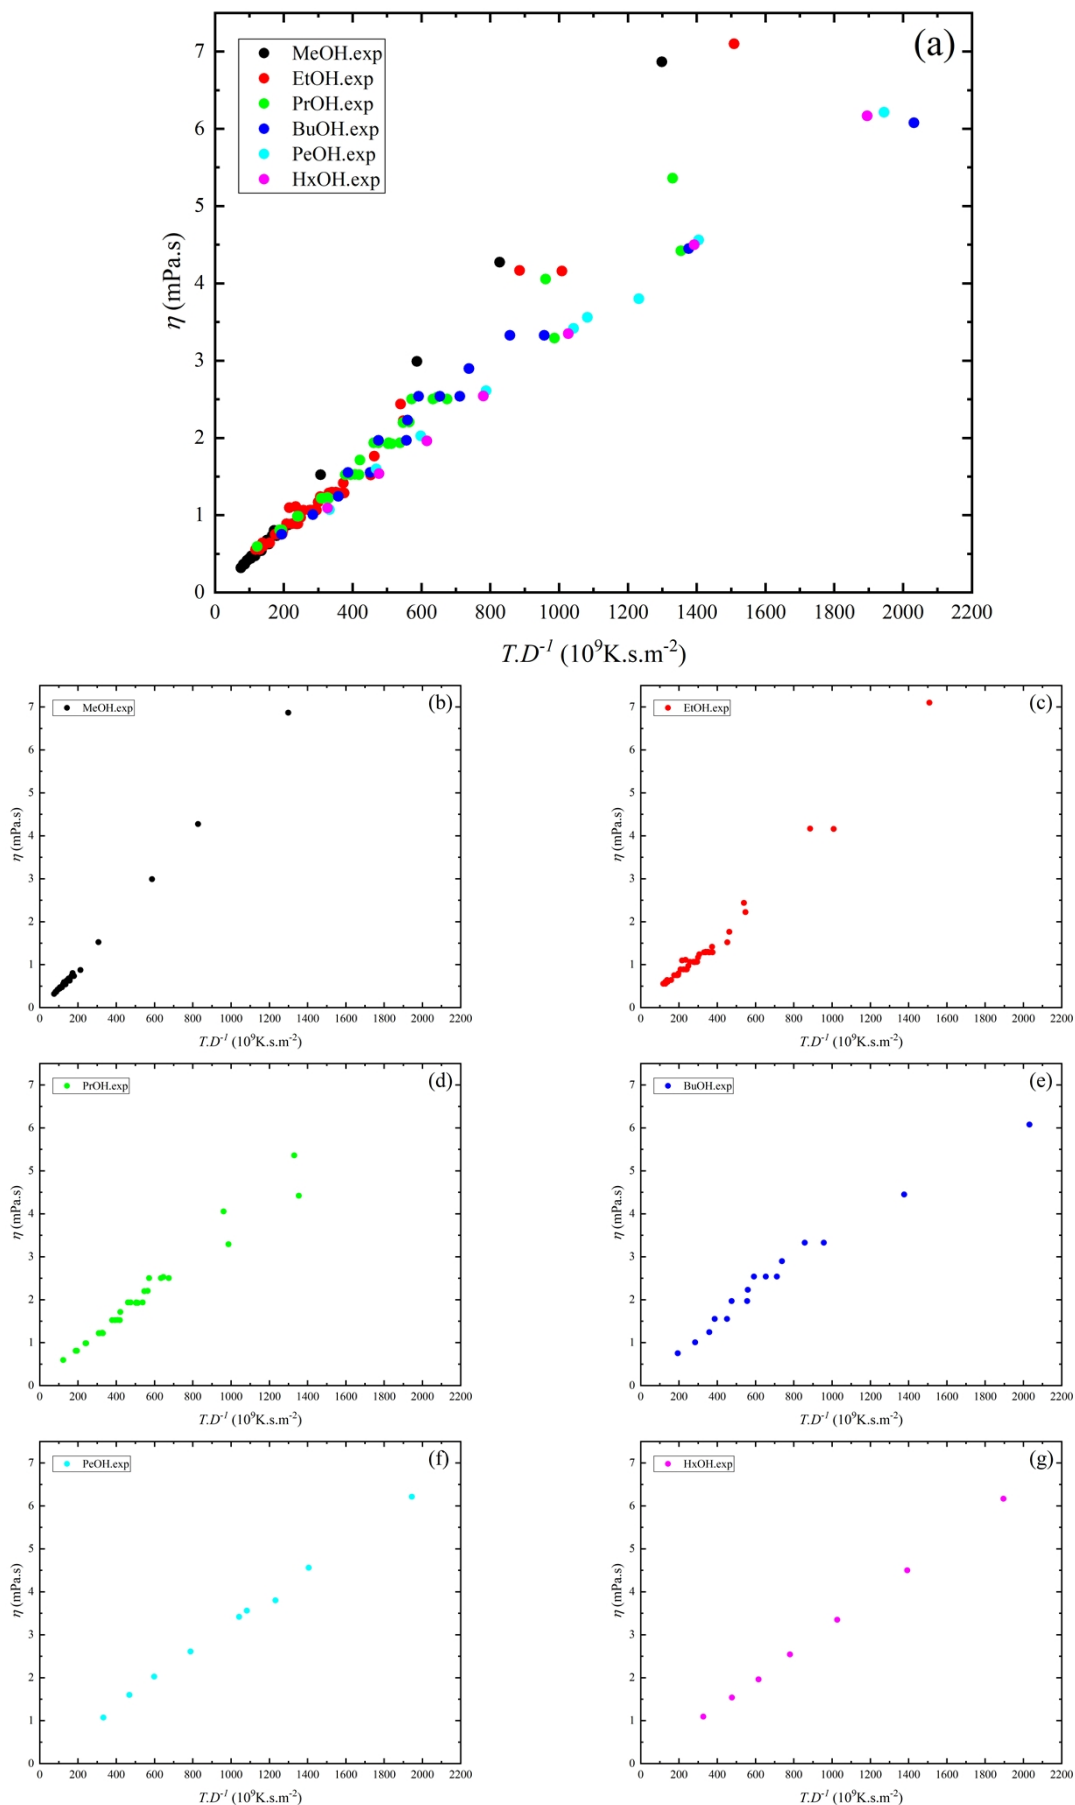

**Figure S4:** OPLS-AA and TraPPE-UA force fields Single molecule snapshots for 1-alkanol from methanol to 1-hexanol.

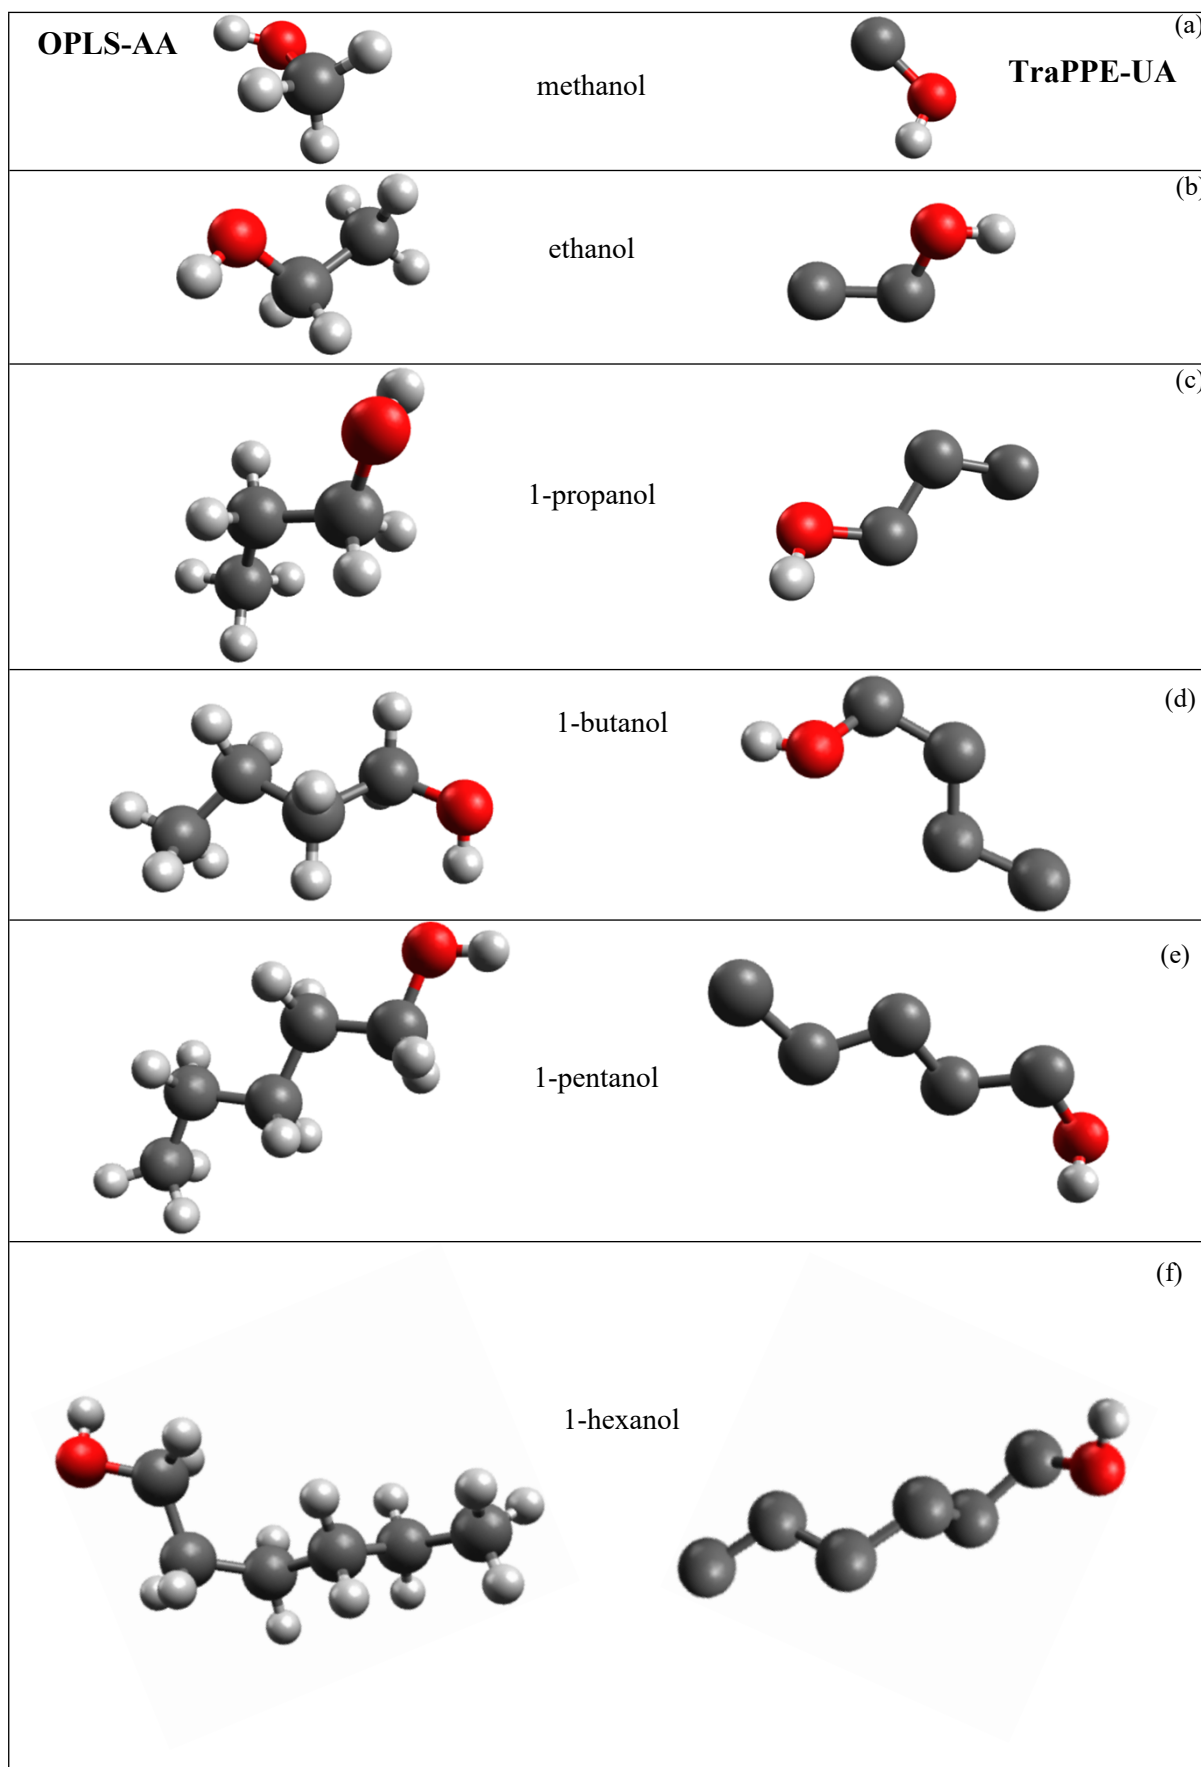

**Table S1:** Lennard-Jones parameters and the geometries of the TraPPE-UA and OPLS-AA force field. The harmonic and torsional potentials are used to control bond angle bending and to control the dihedral rotations around bonds, and the bonded potential can be written as:

$$U_b = \sum_{\text{angles}} \frac{k_\theta}{2} (\theta - \theta_{eq})^2 + \sum_{\text{dihedrals}} \sum_{i=1}^3 T_i [1 - (-1)^i \cos(i\varphi)]$$

where  $k_\theta$  is the spring constant,  $\theta_{eq}$  is the equilibrium angle,  $\varphi$  is the angle between the planes of the angles, and  $F_i$  are the Fourier coefficients.

| TraPPE-UA non-bonded parameters and geometries      |                                         |                                                                        |                                                     |                               |                               |
|-----------------------------------------------------|-----------------------------------------|------------------------------------------------------------------------|-----------------------------------------------------|-------------------------------|-------------------------------|
| Atom (pseudo)                                       | Type                                    | $\sigma$ (nm)                                                          | $\epsilon$ (kJ/mol)                                 | $q$ (e)                       |                               |
| CH <sub>3</sub>                                     | [CH <sub>3</sub> ]-O-H                  | 0.375                                                                  | 0.814815094                                         | 0.265                         |                               |
| CH <sub>3</sub>                                     | [CH <sub>3</sub> ]-CH <sub>x</sub>      | 0.375                                                                  | 0.814815094                                         | 0                             |                               |
| CH <sub>2</sub>                                     | CH <sub>x</sub> -[CH <sub>2</sub> ]-O-H | 0.395                                                                  | 0.382464228                                         | 0.265                         |                               |
| O                                                   | CH <sub>x</sub> -[O]-H                  | 0.302                                                                  | 0.773242895                                         | -0.7                          |                               |
| H                                                   | O-[H]                                   | 0                                                                      | 0                                                   | 0.435                         |                               |
| Bond type                                           | Bond-length (nm)                        |                                                                        | Angle type                                          | $\theta$ (degrees)            |                               |
| CH <sub>x</sub> -CH <sub>y</sub>                    | 0.154                                   |                                                                        | CH <sub>x</sub> -(CH <sub>2</sub> )-CH <sub>y</sub> | 114                           |                               |
| CH <sub>x</sub> -OH                                 | 0.143                                   |                                                                        | CH <sub>x</sub> -(CH <sub>y</sub> )-OH              | 109.47                        |                               |
| O-H                                                 | 0.0945                                  |                                                                        | CH <sub>x</sub> -(O)-H                              | 108.5                         |                               |
| Bend type                                           | $k_\theta$ (kJ.mol <sup>-1</sup> )      | Torsion type                                                           | $T_1$ (kJ.mol <sup>-1</sup> )                       | $T_2$ (kJ.mol <sup>-1</sup> ) | $T_3$ (kJ.mol <sup>-1</sup> ) |
| CH <sub>x</sub> -(CH <sub>2</sub> )-CH <sub>y</sub> | 519.6539                                | CH <sub>x</sub> -(CH <sub>2</sub> )-(CH <sub>2</sub> )-CH <sub>y</sub> | 1.5486                                              | -0.2974                       | 3.4516                        |
| CH <sub>x</sub> -(CH <sub>2</sub> )-OH              | 419.0489                                | CH <sub>x</sub> -(CH <sub>2</sub> )-(CH <sub>2</sub> )-O               | 0.7704                                              | -0.2327                       | 3.3583                        |
| CH <sub>x</sub> -(O)-H                              | 460.6212                                | CH <sub>x</sub> -(CH <sub>2</sub> )-(O)-H                              | 0.9152                                              | -0.1272                       | 0.8197                        |

| OPLS-AA non-bonded parameters and geometries |                                                     |               |                               |                               |                               |
|----------------------------------------------|-----------------------------------------------------|---------------|-------------------------------|-------------------------------|-------------------------------|
| Atom (pseudo)                                | Type                                                | $\sigma$ (nm) | $\epsilon$ (kJ/mol)           | $q$ (e)                       |                               |
| H                                            | C(H) <sub>3</sub> -CH <sub>2</sub> -R               | 0.25          | 0.12552                       | 0.06                          |                               |
| H                                            | CH <sub>x</sub> -C(H) <sub>2</sub> -CH <sub>y</sub> | 0.25          | 0.12552                       | 0.06                          |                               |
| C                                            | (C)H <sub>3</sub> -C                                | 0.35          | 0.276144                      | -0.18                         |                               |
| C                                            | CH <sub>x</sub> -(C)H <sub>2</sub> -CH <sub>y</sub> | 0.35          | 0.276144                      | -0.12                         |                               |
| C                                            | (C)H <sub>x</sub> -OH                               | 0.35          | 0.276144                      | 0.145                         |                               |
| O                                            | C-(O)-H                                             | 0.312         | 0.71128                       | -0.683                        |                               |
| H                                            | O-(H)                                               | 0             | 0                             | 0.418                         |                               |
| H                                            | C(H) <sub>3</sub> -OH                               | 0.25          | 0.12552                       | 0.04                          |                               |
| Bond type                                    | Bond-length (nm)                                    |               | Angle type                    | $\theta$ (degrees)            |                               |
| H-O                                          | 0.0945                                              |               | C-C-H                         | 110.7                         |                               |
| C-C                                          | 0.1529                                              |               | H-C-O                         | 109.5                         |                               |
| C-O                                          | 0.141                                               |               | C-O-H                         | 108.5                         |                               |
| C-H                                          | 0.109                                               |               | C-C-C                         | 112.7                         |                               |
|                                              |                                                     |               | H-C-H                         | 107.8                         |                               |
|                                              |                                                     |               | C-C-O                         | 109.5                         |                               |
| Bend type                                    | $k_\theta$ (kJ.mol <sup>-1</sup> )                  | Torsion type  | $T_1$ (kJ.mol <sup>-1</sup> ) | $T_2$ (kJ.mol <sup>-1</sup> ) | $T_3$ (kJ.mol <sup>-1</sup> ) |
| C-C-C                                        | 488.273                                             | C-C-C-O       | 3.5794                        | -1.046                        | 1.386996                      |
| C-C-O                                        | 418.4                                               | C-C-O-HO      | -0.74475                      | -0.36401                      | 1.029264                      |
| C-O-Ho                                       | 460.24                                              | H-C-O-HO      | 0                             | 0                             | 0.9414                        |
| H-C- H                                       | 276.144                                             | H-C-C-O       | 0                             | 0                             | 0.97905                       |
| H-C- O                                       | 292.88                                              | H-C-C-H       | 0                             | 0                             | 0.6276                        |
|                                              |                                                     | C-C-C-H       | 0                             | 0                             | 0.6276                        |

**Figure S5:** initial model diagram for molecular dynamics simulation.

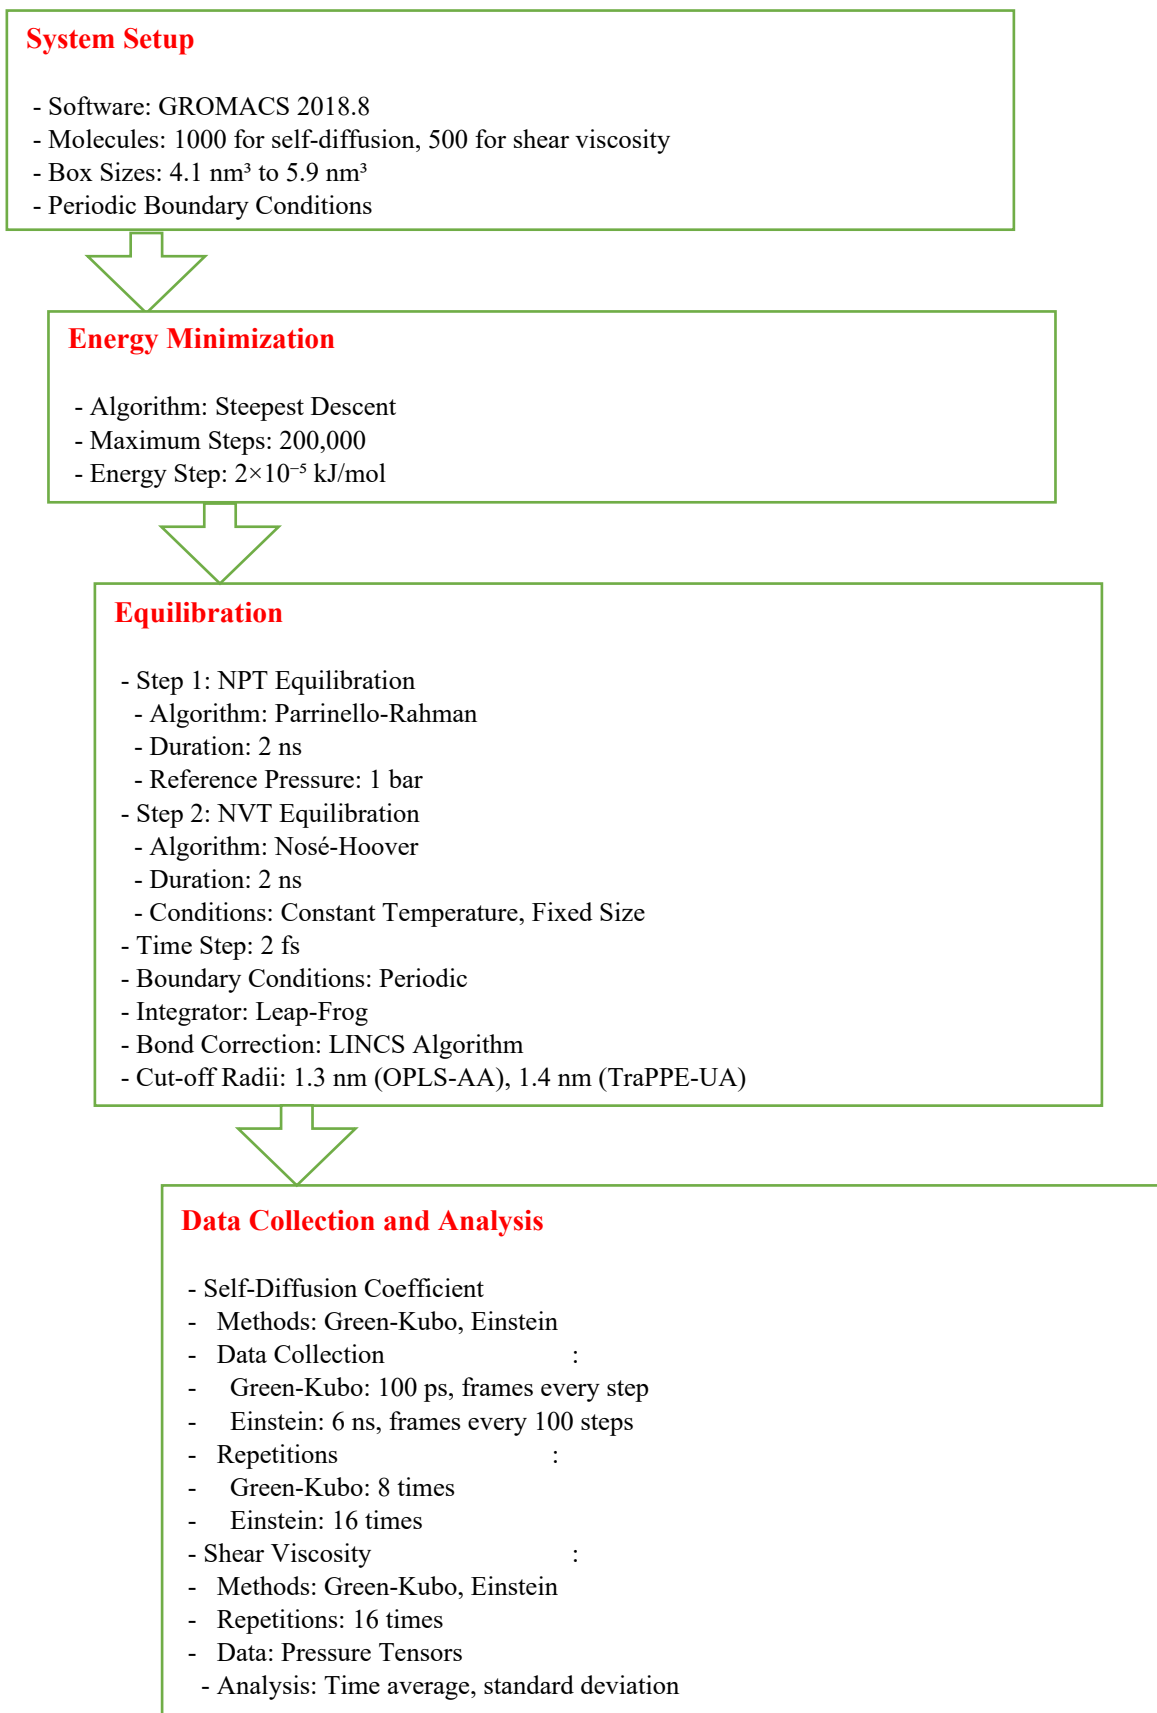





|     |             |           |             |           |             |            |             |           |             |
|-----|-------------|-----------|-------------|-----------|-------------|------------|-------------|-----------|-------------|
| 320 | 6.022±0.024 | 776.8±4.7 | 5.940±0.011 | 809.4±2.3 | 4.808±0.015 | 763.2±7.0  | 4.728±0.014 | 802.7±7.2 | 799.56±0.12 |
| 330 | 6.075±0.023 | 756.5±4.2 | 5.960±0.012 | 801.5±2.5 | 4.818±0.022 | 758.4±10.6 | 4.738±0.012 | 797.6±6.2 | 792.00±0.12 |

**Figure S6:** Examples of MSD and VACF profiles for 1-alkanols at 200 K and 330 K.

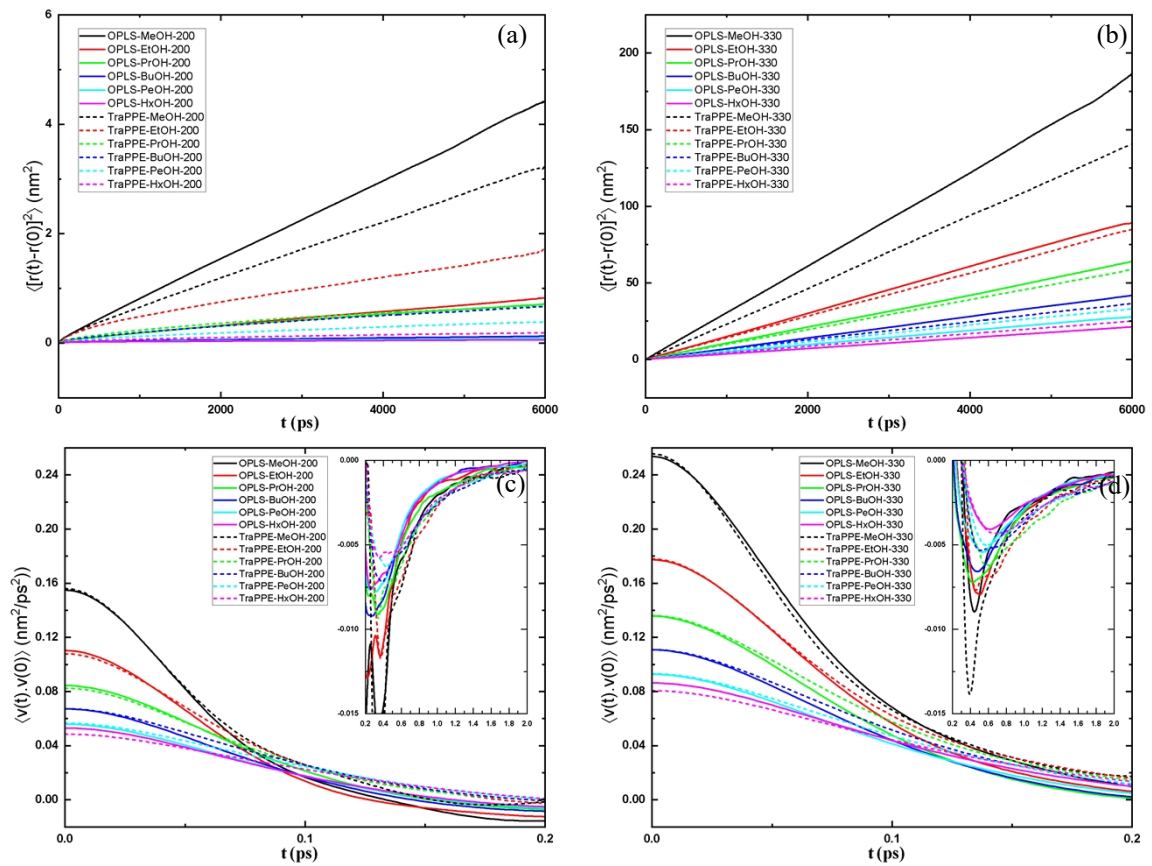

**Figure S7:** Trials of the self-diffusion by the GK method.

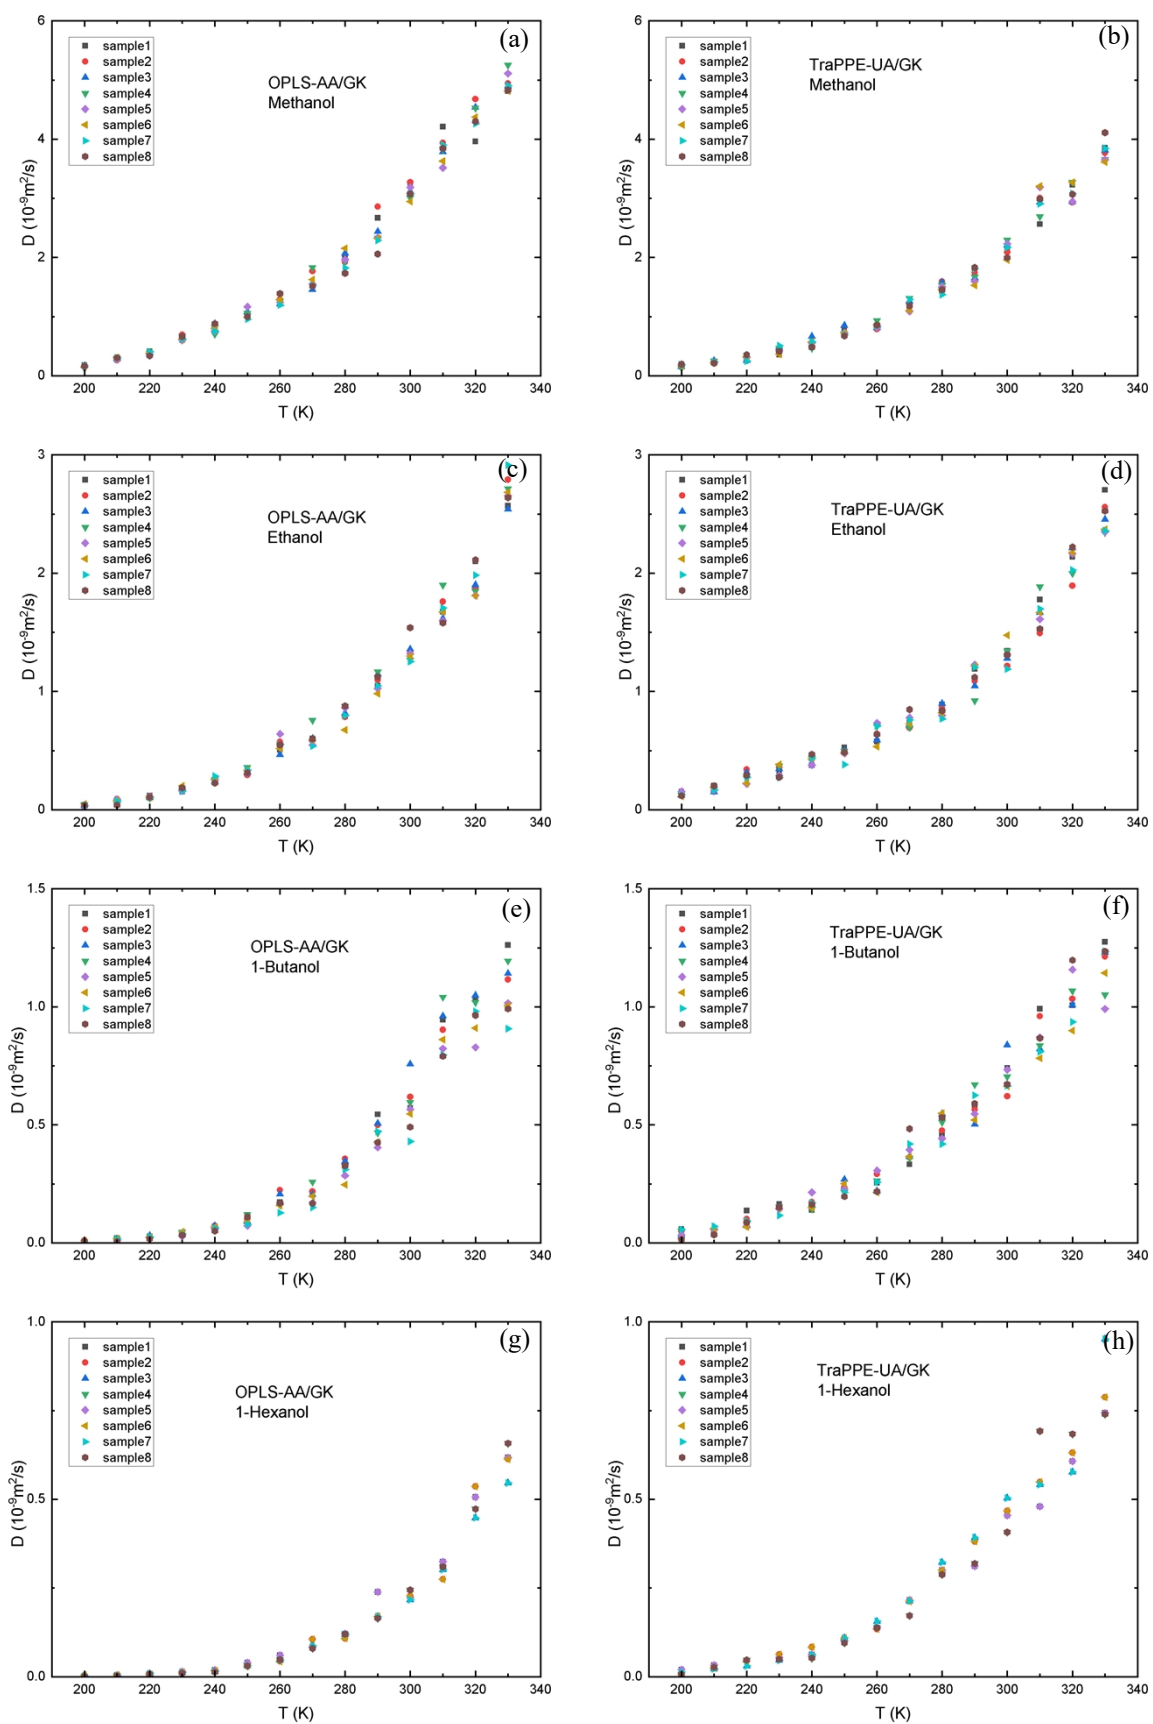

**Figure S8:** The average time dependence integral values of shear viscosity for methanol, 1-propanol, and 1-pentanol at 200, 270, and 330 K by GK and MSD methods and for both TraPPE-UA and OPLS-AA force fields.

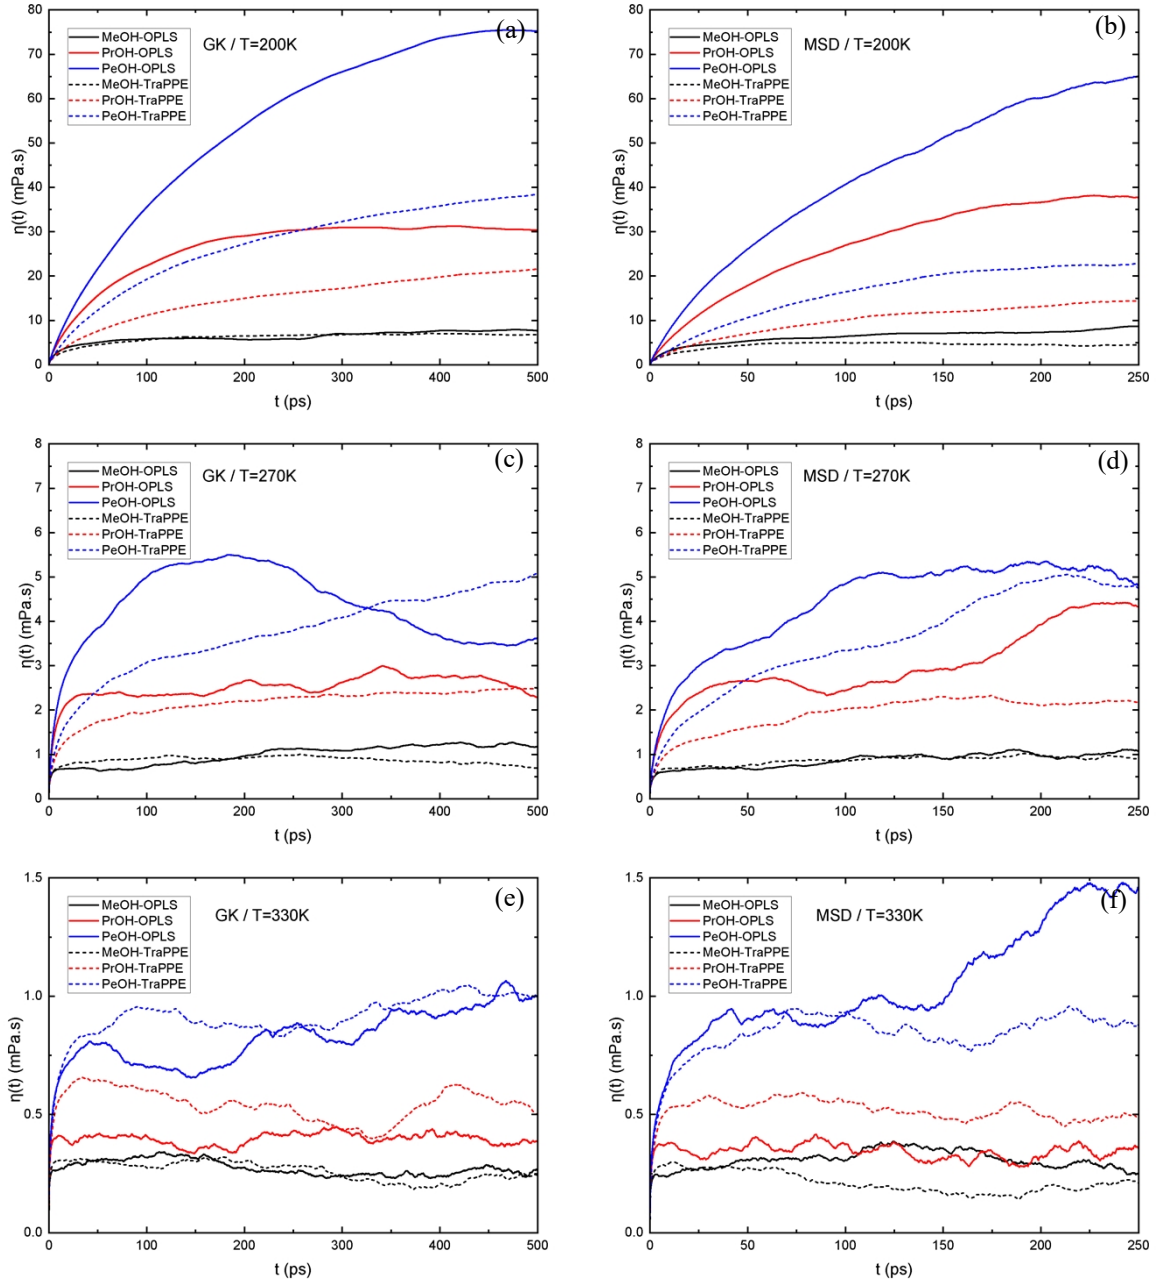

**Figure S9:** Independents trials for time dependence integral shear viscosity for methanol and 1-hexanol at 240 and 290 K by GK and MSD methods and for both TraPPE-UA and OPLS-AA force fields.

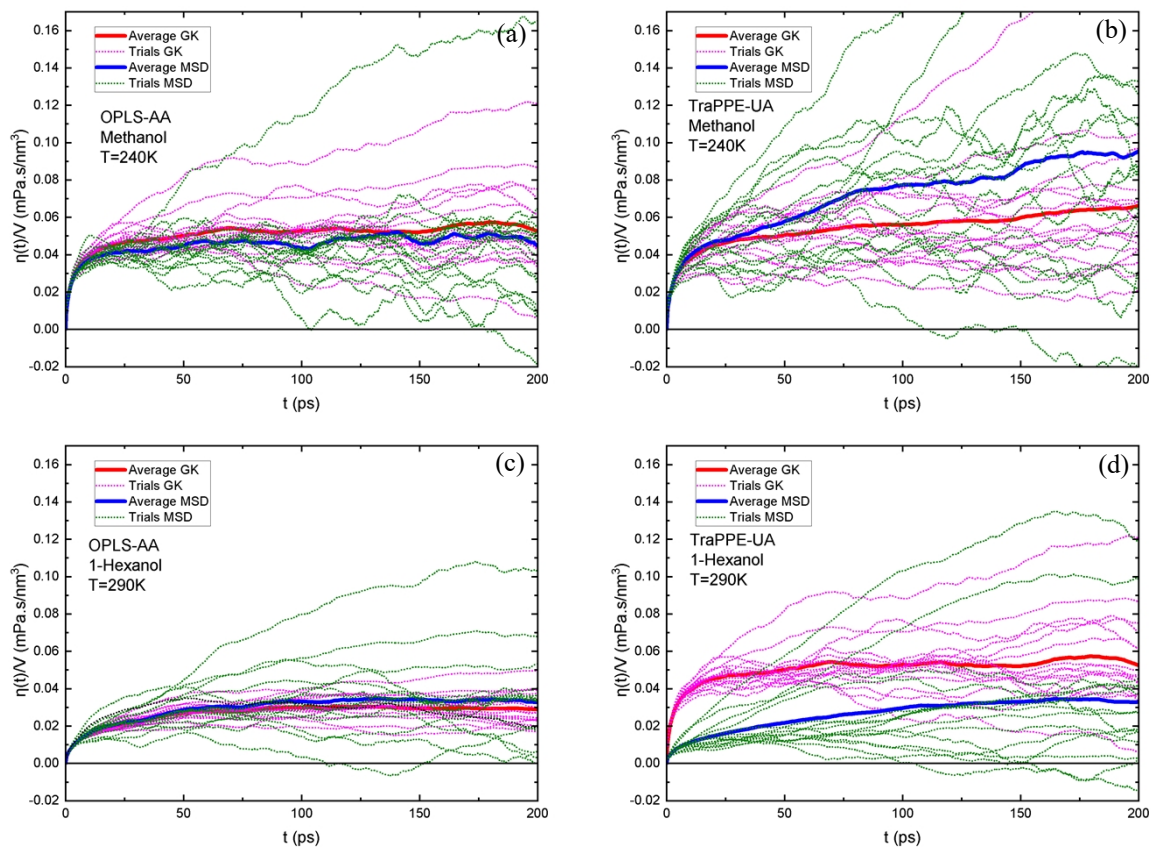

**Table S3:** Comparison of MD shear viscosity results between this study and some results from other studies.

|            | $T$ (K) | $\eta$ (mPa. s) | ref  | model       | This work<br>(OPLS-AA<br>/GK) | This work<br>(TraPPE-UA<br>/GK) | Exp. (This<br>work Fitt) |
|------------|---------|-----------------|------|-------------|-------------------------------|---------------------------------|--------------------------|
| methanol   | 213     | 3.1             | 56   | Their model | 3.503                         | 4.144                           | 2.989                    |
|            | 220     | 2.0             | 56   | Their model | 2.783                         | 3.265                           | 2.471                    |
|            | 240     | 1.7             | 56   | Their model | 1.552                         | 1.783                           | 1.525                    |
|            | 260     | 1.0             | 56   | Their model | 0.947                         | 1.069                           | 1.013                    |
|            | 278.15  | 0.64            | 56   | Their model | 0.643                         | 0.716                           | 0.736                    |
|            | 288     | 0.62            | 56   | Their model | 0.532                         | 0.588                           | 0.629                    |
|            | 298.15  | 0.57            | 56   | Their model | 0.443                         | 0.487                           | 0.541                    |
|            | 308.15  | 0.47            | 56   | Their model | 0.375                         | 0.409                           | 0.471                    |
|            | 318.15  | 0.41            | 56   | Their model | 0.320                         | 0.348                           | 0.414                    |
|            | 328.15  | 0.42            | 56   | Their model | 0.276                         | 0.299                           | 0.366                    |
|            | 340.15  | 0.29            | 56   | Their model | 0.234                         | 0.251                           | 0.319                    |
| ethanol    | 239     | 3.1             | 56   | Their model | 3.571                         | 2.830                           | 4.160                    |
|            | 253.15  | 2.4             | 56   | Their model | 2.358                         | 1.953                           | 2.833                    |
|            | 263     | 2.2             | 56   | Their model | 1.813                         | 1.544                           | 2.221                    |
|            | 273.15  | 1.7             | 56   | Their model | 1.411                         | 1.234                           | 1.761                    |
|            | 280     | 1.4             | 56   | Their model | 1.204                         | 1.071                           | 1.520                    |
|            | 298.15  | 1.1             | 56   | Their model | 0.819                         | 0.758                           | 1.063                    |
|            | 308.15  | 1.0             | 56   | Their model | 0.675                         | 0.638                           | 0.889                    |
|            | 320     | 0.8             | 56   | Their model | 0.545                         | 0.527                           | 0.730                    |
|            | 328.15  | 0.61            | 56   | Their model | 0.475                         | 0.466                           | 0.643                    |
|            | 333     | 0.60            | 56   | Their model | 0.439                         | 0.434                           | 0.597                    |
|            | 338.15  | 0.47            | 56   | Their model | 0.405                         | 0.404                           | 0.554                    |
|            | 343     | 0.56            | 58   | GAFF        | 0.376                         | 0.378                           | 0.517                    |
|            | 323     | 0.82            | 58   | GAFF        | 0.518                         | 0.503                           | 0.696                    |
|            | 303     | 1.17            | 58   | GAFF        | 0.744                         | 0.696                           | 0.974                    |
|            | 298     | 1.32            | 58   | GAFF        | 0.821                         | 0.760                           | 1.066                    |
| 283        | 1.93    | 58              | GAFF | 1.126       | 1.008                         | 1.428                           |                          |
| 1-propanol | 263.15  | 4.72            | 57   | OPLS-AA     | 2.879                         | 2.147                           | 5.167                    |
|            | 273.15  | 3.57            | 57   | OPLS-AA     | 2.123                         | 1.651                           | 3.805                    |
|            | 283.15  | 2.64            | 57   | OPLS-AA     | 1.600                         | 1.293                           | 2.863                    |
|            | 293.15  | 2.03            | 57   | OPLS-AA     | 1.229                         | 1.030                           | 2.197                    |
|            | 303.15  | 1.67            | 57   | OPLS-AA     | 0.961                         | 0.833                           | 1.715                    |
|            | 313.15  | 1.49            | 57   | OPLS-AA     | 0.763                         | 0.682                           | 1.360                    |
|            | 323.15  | 1.20            | 57   | OPLS-AA     | 0.615                         | 0.566                           | 1.095                    |
|            | 333.15  | 0.95            | 57   | OPLS-AA     | 0.502                         | 0.475                           | 0.892                    |
|            | 298.15  | 1.86            | 57   | OPLS-AA     | 1.085                         | 0.924                           | 1.937                    |
| 1-butanol  | 298.15  | 2.52            | 57   | OPLS-AA     | 1.409                         | 1.296                           | 2.537                    |
| 1-pentanol | 298.15  | 3.22            | 57   | OPLS-AA     | 2.008                         | 1.590                           | 3.418                    |
| 1-hexanol  | 298.15  | 4.38            | 57   | OPLS-AA     | 2.887                         | 2.068                           | 4.500                    |

**Table S4:** Comparison of MD self-diffusion results between this study and some results from other studies.

|          | $T$ (K) | $D$ ( $10^{-9} \text{ m}^2 \cdot \text{s}^{-1}$ ) | Ref.    | Model            | This work<br>(OPLS-AA<br>/MSD) | This work<br>(TraPPE-UA<br>/MSD) | Exp. (This<br>work Fitt) |
|----------|---------|---------------------------------------------------|---------|------------------|--------------------------------|----------------------------------|--------------------------|
| methanol | 213     | 0.318                                             | 56      | Their model      | 0.264                          | 0.164                            | 0.292                    |
|          | 220     | 0.433                                             | 56      | Their model      | 0.346                          | 0.218                            | 0.369                    |
|          | 240     | 0.750                                             | 56      | Their model      | 0.689                          | 0.448                            | 0.669                    |
|          | 260     | 1.21                                              | 56      | Their model      | 1.234                          | 0.826                            | 1.105                    |
|          | 278.15  | 1.72                                              | 56      | Their model      | 1.948                          | 1.333                            | 1.638                    |
|          | 288     | 2.09                                              | 56      | Their model      | 2.436                          | 1.684                            | 1.986                    |
|          | 298.15  | 2.41                                              | 56      | Their model      | 3.019                          | 2.110                            | 2.391                    |
|          | 308.15  | 2.97                                              | 56      | Their model      | 3.680                          | 2.597                            | 2.836                    |
|          | 318.15  | 3.54                                              | 56      | Their model      | 4.430                          | 3.154                            | 3.328                    |
|          | 328.15  | 4.15                                              | 56      | Their model      | 5.273                          | 3.786                            | 3.867                    |
|          | 340.15  | 4.91                                              | 56      | Their model      | 6.411                          | 4.647                            | 4.577                    |
|          | 292     | 2.36                                              | 59      | OPLS-AA          | 2.656                          | 1.844                            | 2.140                    |
|          | 213     | 0.39                                              | 60      | OPLS-AA          | 0.264                          | 0.164                            | 0.292                    |
|          | 240     | 0.78                                              | 60      | OPLS-AA          | 0.689                          | 0.448                            | 0.669                    |
|          | 292     | 2.16                                              | 60      | OPLS-AA          | 2.656                          | 1.844                            | 2.140                    |
|          | 298     | 2.41                                              | 61      | Modified OPLS-AA | 3.010                          | 2.103                            | 2.385                    |
|          | 308     | 2.94                                              | 61      | Modified OPLS-AA | 3.670                          | 2.589                            | 2.829                    |
|          | 318     | 3.46                                              | 61      | Modified OPLS-AA | 4.418                          | 3.145                            | 3.320                    |
|          | 328     | 4.18                                              | 61      | Modified OPLS-AA | 5.260                          | 3.776                            | 3.859                    |
|          | 338     | 4.94                                              | 61      | Modified OPLS-AA | 6.197                          | 4.484                            | 4.445                    |
|          | 298     | 3.12                                              | 61      | OPLS-AA          | 3.010                          | 2.103                            | 2.385                    |
|          | 308     | 3.87                                              | 61      | OPLS-AA          | 3.670                          | 2.589                            | 2.829                    |
|          | 318     | 4.56                                              | 61      | OPLS-AA          | 4.418                          | 3.145                            | 3.320                    |
|          | 328     | 5.43                                              | 61      | OPLS-AA          | 5.260                          | 3.776                            | 3.859                    |
| 338      | 6.30    | 61                                                | OPLS-AA | 6.197            | 4.484                          | 4.445                            |                          |
| ethanol  | 239     | 0.192                                             | 56      | Their model      | 0.166                          | 0.218                            | 0.182                    |
|          | 253.15  | 0.250                                             | 56      | Their model      | 0.292                          | 0.356                            | 0.303                    |
|          | 263     | 0.363                                             | 56      | Their model      | 0.419                          | 0.486                            | 0.418                    |
|          | 273.15  | 0.493                                             | 56      | Their model      | 0.590                          | 0.654                            | 0.568                    |
|          | 280     | 0.640                                             | 56      | Their model      | 0.733                          | 0.790                            | 0.690                    |
|          | 298.15  | 1.070                                             | 56      | Their model      | 1.243                          | 1.247                            | 1.106                    |
|          | 308.15  | 1.330                                             | 56      | Their model      | 1.618                          | 1.567                            | 1.400                    |
|          | 320     | 1.680                                             | 56      | Their model      | 2.167                          | 2.017                            | 1.817                    |
|          | 328.15  | 2.010                                             | 56      | Their model      | 2.616                          | 2.374                            | 2.151                    |
|          | 333     | 2.200                                             | 56      | Their model      | 2.913                          | 2.606                            | 2.368                    |
|          | 338.15  | 2.400                                             | 56      | Their model      | 3.255                          | 2.869                            | 2.616                    |
|          | 290     | 0.900                                             | 59      | OPLS-AA          | 0.989                          | 1.023                            | 0.901                    |
|          | 333     | 2.400                                             | 59      | OPLS-AA          | 2.913                          | 2.606                            | 2.368                    |
|          | 218     | 0.139                                             | 60      | OPLS-AA          | 0.062                          | 0.093                            | 0.076                    |
|          | 239     | 0.260                                             | 60      | OPLS-AA          | 0.166                          | 0.218                            | 0.182                    |
|          | 290     | 1.030                                             | 60      | OPLS-AA          | 0.989                          | 1.023                            | 0.901                    |
|          | 333     | 2.340                                             | 60      | OPLS-AA          | 2.913                          | 2.606                            | 2.368                    |

|            |     |       |    |                  |       |       |       |
|------------|-----|-------|----|------------------|-------|-------|-------|
|            | 298 | 1.160 | 61 | Modified OPLS-AA | 1.238 | 1.242 | 1.102 |
|            | 308 | 1.526 | 61 | Modified OPLS-AA | 1.612 | 1.562 | 1.395 |
|            | 318 | 1.858 | 61 | Modified OPLS-AA | 2.066 | 1.935 | 1.742 |
|            | 328 | 2.394 | 61 | Modified OPLS-AA | 2.607 | 2.367 | 2.144 |
|            | 338 | 2.870 | 61 | Modified OPLS-AA | 3.245 | 2.861 | 2.608 |
|            | 298 | 1.380 | 61 | OPLS-AA          | 1.238 | 1.242 | 1.102 |
|            | 308 | 1.707 | 61 | OPLS-AA          | 1.612 | 1.562 | 1.395 |
|            | 318 | 2.216 | 61 | OPLS-AA          | 2.066 | 1.935 | 1.742 |
|            | 328 | 2.717 | 61 | OPLS-AA          | 2.607 | 2.367 | 2.144 |
|            | 338 | 3.254 | 61 | OPLS-AA          | 3.245 | 2.861 | 2.608 |
| 1-propanol | 298 | 0.617 | 61 | Modified OPLS-AA | 0.778 | 0.754 | 0.605 |
|            | 308 | 0.814 | 61 | Modified OPLS-AA | 1.056 | 0.975 | 0.807 |
|            | 318 | 1.101 | 61 | Modified OPLS-AA | 1.406 | 1.240 | 1.057 |
|            | 328 | 1.420 | 61 | Modified OPLS-AA | 1.839 | 1.555 | 1.362 |
|            | 338 | 1.778 | 61 | Modified OPLS-AA | 2.368 | 1.924 | 1.730 |
|            | 298 | 0.898 | 61 | OPLS-AA          | 0.778 | 0.754 | 0.605 |
|            | 308 | 1.195 | 61 | OPLS-AA          | 1.056 | 0.975 | 0.807 |
|            | 318 | 1.490 | 61 | OPLS-AA          | 1.406 | 1.240 | 1.057 |
|            | 328 | 1.954 | 61 | OPLS-AA          | 1.839 | 1.555 | 1.362 |
|            | 338 | 2.434 | 61 | OPLS-AA          | 2.368 | 1.924 | 1.730 |
| 1-butanol  | 293 | 0.403 | 61 | Modified OPLS-AA | 0.394 | 0.449 | 0.369 |
|            | 298 | 0.452 | 61 | Modified OPLS-AA | 0.472 | 0.515 | 0.433 |
|            | 303 | 0.531 | 61 | Modified OPLS-AA | 0.564 | 0.590 | 0.504 |
|            | 293 | 0.474 | 61 | OPLS-AA          | 0.394 | 0.449 | 0.369 |
|            | 298 | 0.555 | 61 | OPLS-AA          | 0.472 | 0.515 | 0.433 |
|            | 303 | 0.632 | 61 | OPLS-AA          | 0.564 | 0.590 | 0.504 |
| 1-pentanol | 298 | 0.301 | 61 | Modified OPLS-AA | 0.280 | 0.398 | 0.282 |
|            | 298 | 0.360 | 61 | OPLS-AA          | 0.280 | 0.398 | 0.282 |
| 1-hexanol  | 298 | 0.218 | 61 | Modified OPLS-AA | 0.188 | 0.274 | 0.203 |
|            | 298 | 0.222 | 61 | OPLS-AA          | 0.188 | 0.274 | 0.203 |

---

**Figure S10:** Temperature dependence of the predicted Stoke-Einstein effective hydrodynamic radius from MD simulations for pure 1-alkanol liquids by using GK-average (GK+MSD) and MSD-average (GK+MSD) methods for self-diffusion and shear viscosity respectively for OPLS-AA and TraPPE-UA force fields.

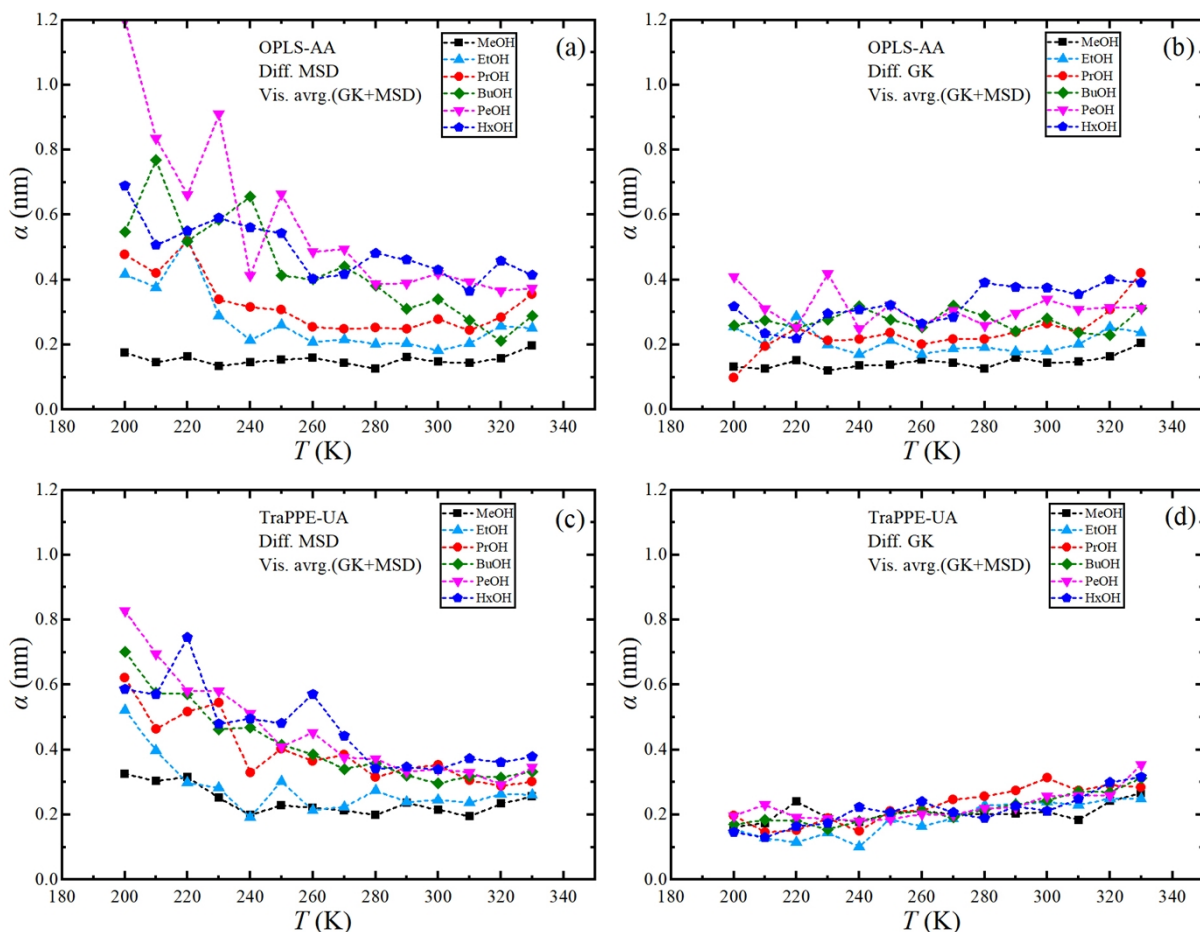

Supplement: d4ra03494e1.pdf [file d4ra03494e1.pdf]
